# Supplementary material
Source: Research Square preprint supplement (doi:10.21203/rs.3.rs-9413337/v1)
Supplement: Supplementary file 2 [file 81624fd7ef212197a555599c.pdf]

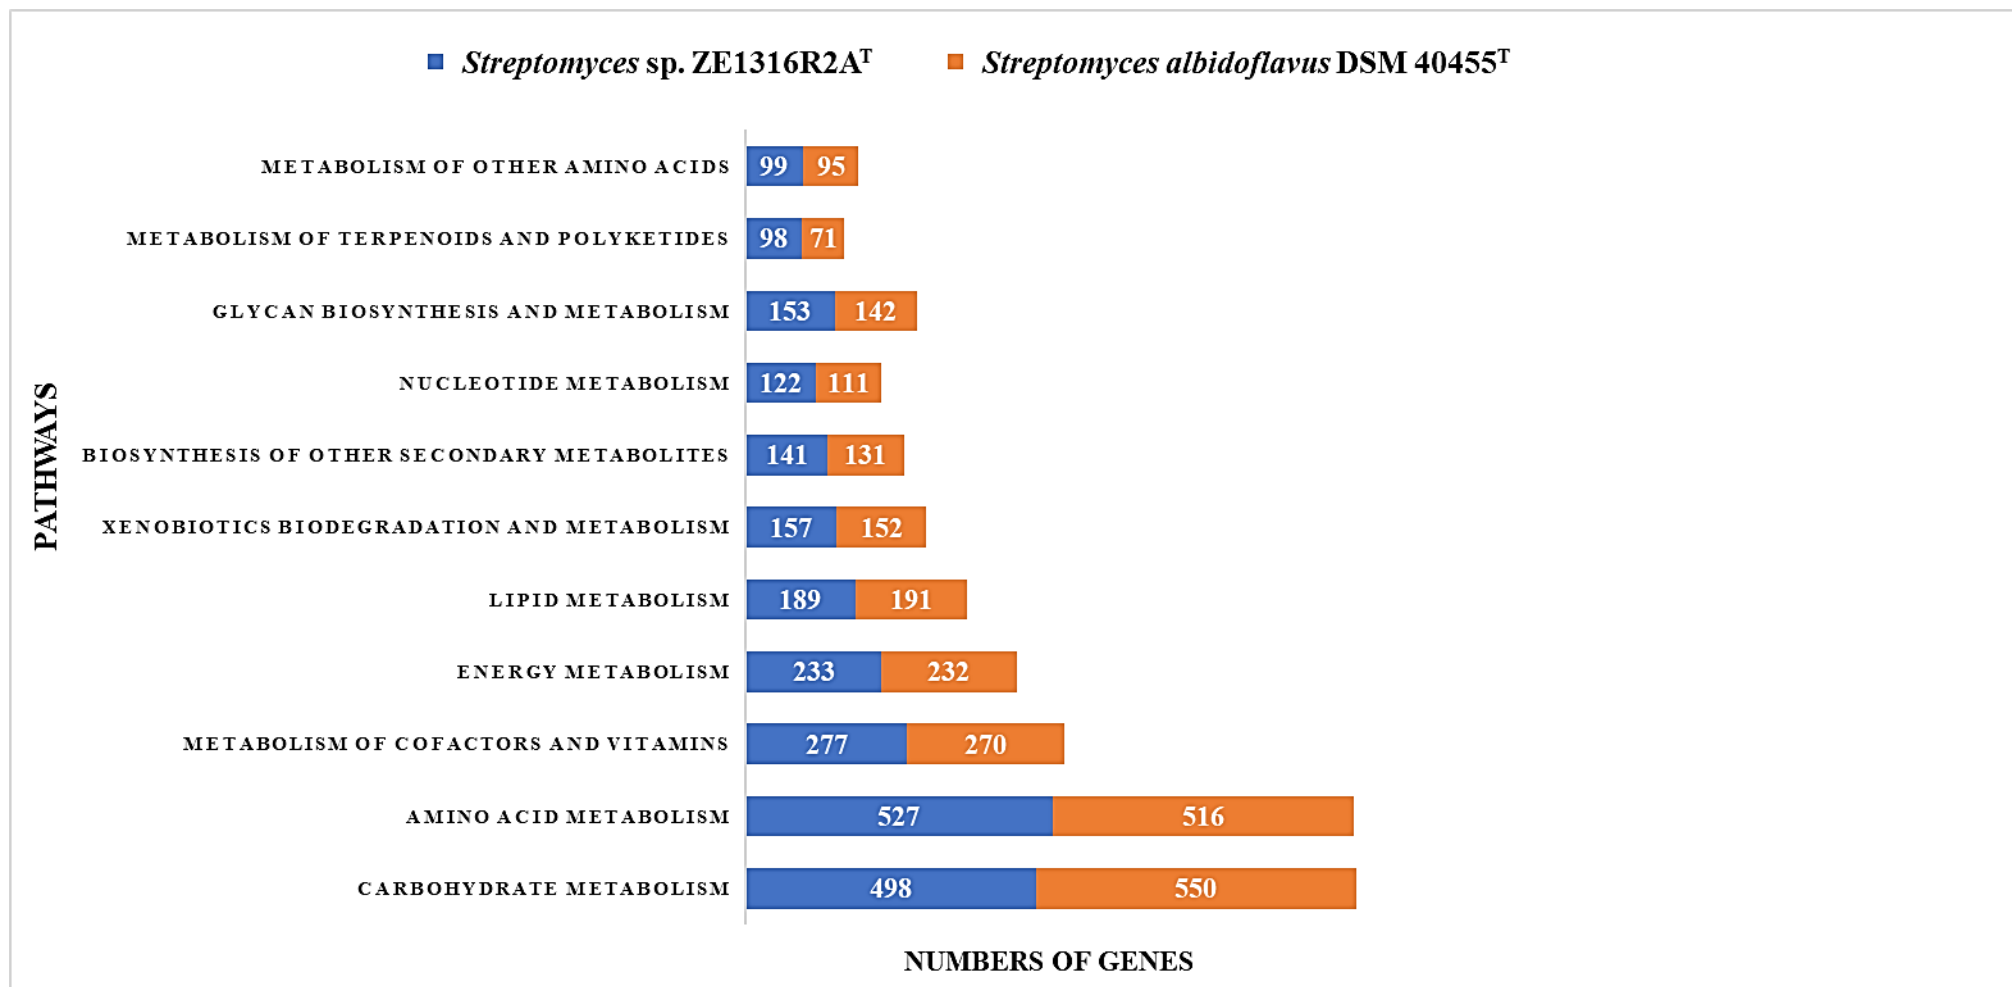

**Figure S1. Comparative functional categorisation of metabolic pathways in *Streptomyces sp. ZE1316R2A*<sup>T</sup> and *Streptomyces albidoflavus DSM 40455*<sup>T</sup> based on KEGG annotation.** The bar chart shows the number of genes assigned to major metabolic pathways in the two genomes: *S. sp. ZE1316R2A*<sup>T</sup> (blue) and *S. albidoflavus DSM 40455*<sup>T</sup> (orange). Categories include carbohydrate, amino acid, lipid, nucleotide, and energy metabolism, as well as the biosynthesis of secondary metabolites.

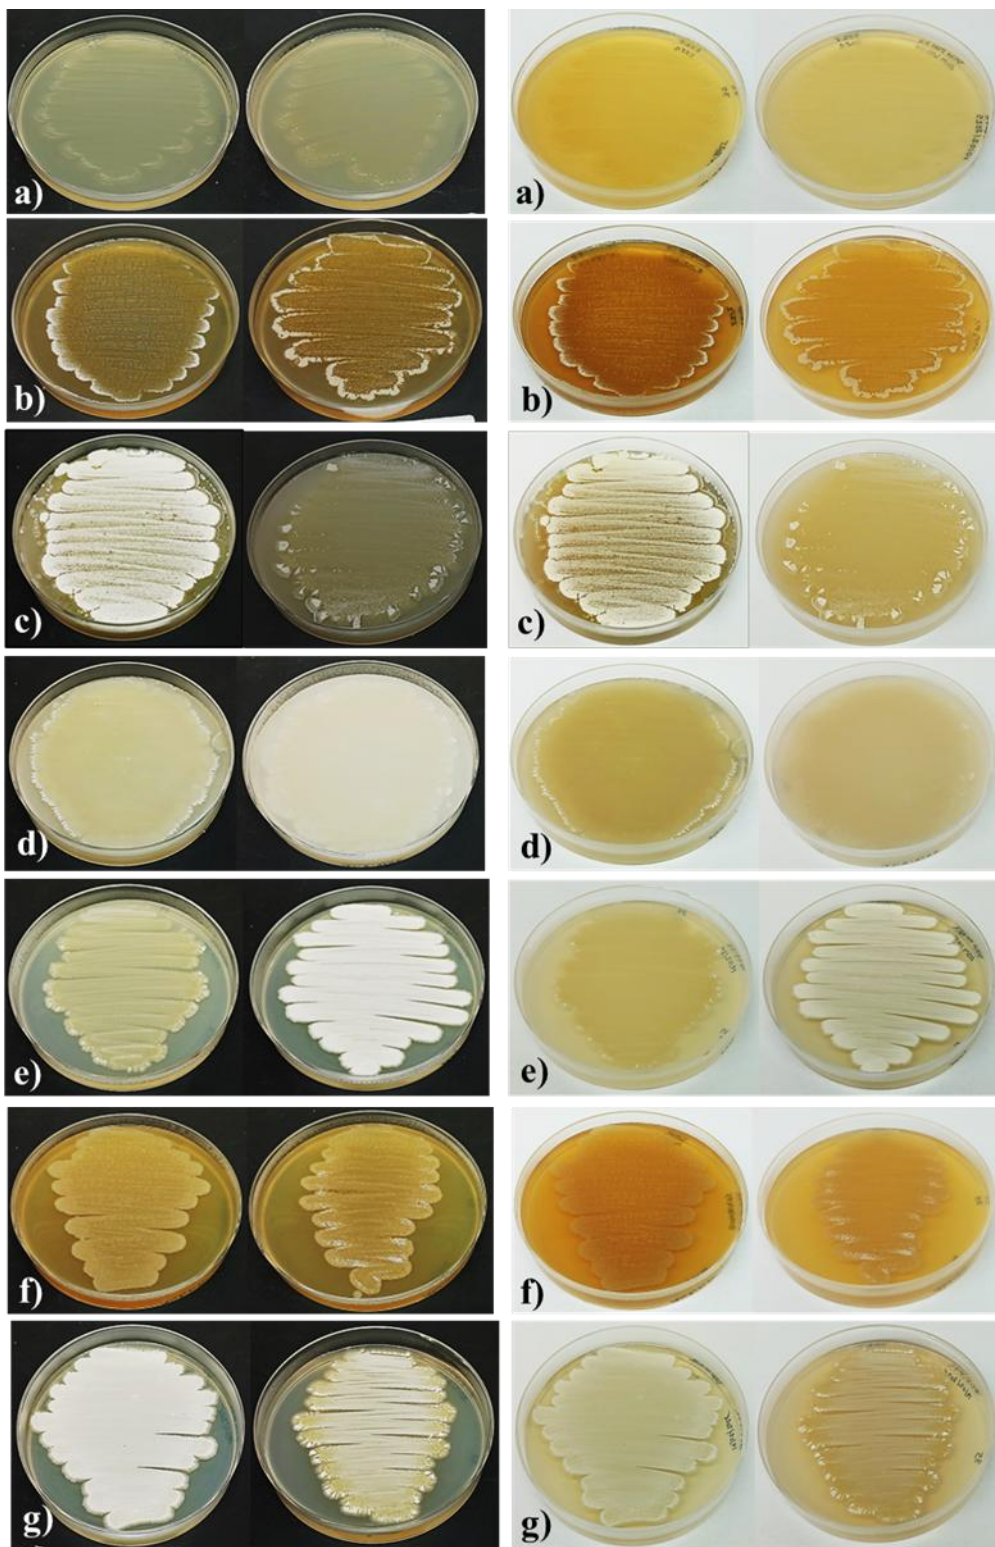

**Figure S2. Comparative cultural characteristics of *Streptomyces* sp. ZE1316R2A<sup>T</sup> (right) and *Streptomyces albidoflavus* DSM 40455<sup>T</sup> (left) grown on ISP media. Representative pictures of cultures grown for 14 days at 30 °C on the following media: (a) ISP 1, (b) ISP 2, (c) ISP 3, (d) ISP 4, (e) ISP 5, (f) ISP 6, and (g) ISP 7.**

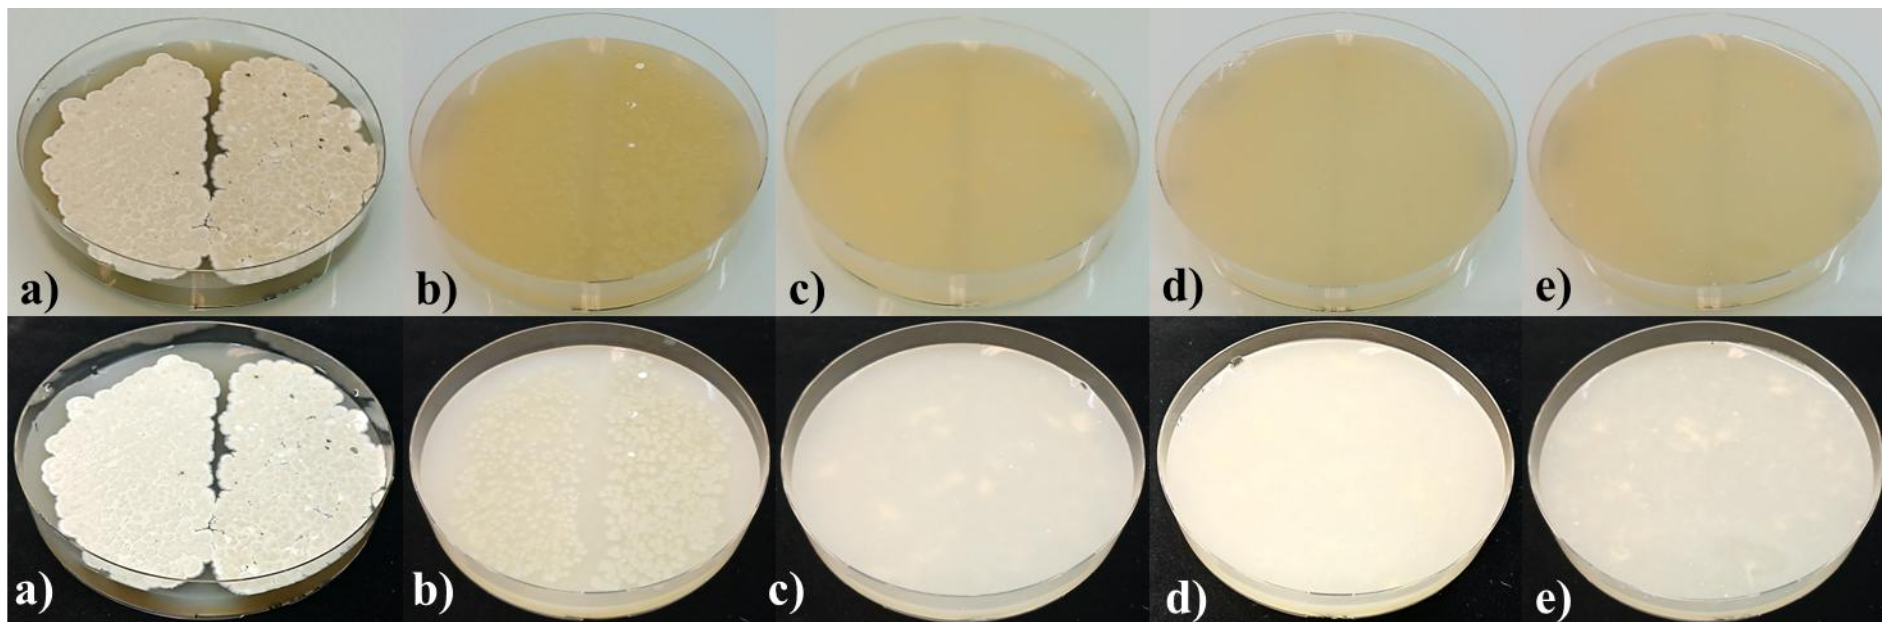

**Figure S3:** Comparative salt tolerance of *Streptomyces* sp. ZE1316R2A<sup>T</sup> (right) and *Streptomyces albidoflavus* DSM 40455<sup>T</sup> (left) grown on Mannitol Soy Flour (MSF) agar supplemented with increasing NaCl concentrations: a) 0%, b) 5%, c) 10%, d) 15%, and e) 20% (w/v). Plates were incubated for 14 days at 30 °C.



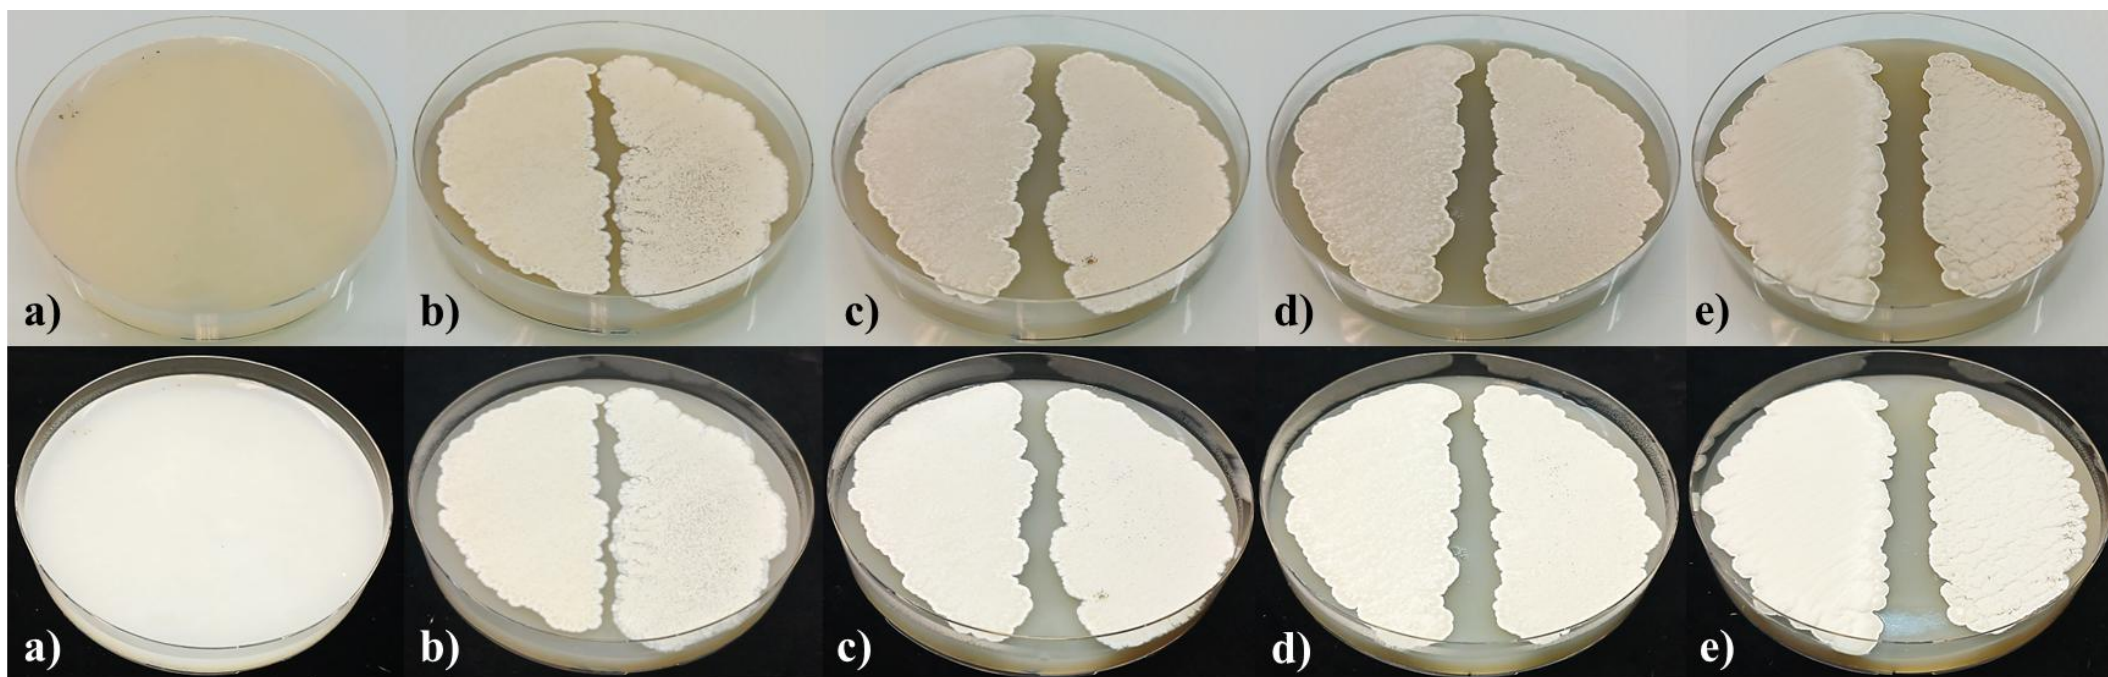

**Figure S5.** Comparative pH tolerance of *Streptomyces* sp. ZE1316R2A<sup>T</sup> (right) and *Streptomyces albidoflavus* DSM 40455<sup>T</sup> (left) grown at different pH: a) 5.5; b) 6.5; c) 7; d) 7.5; and e) 8.5. Plates were incubated for 14 days at 30 °C.

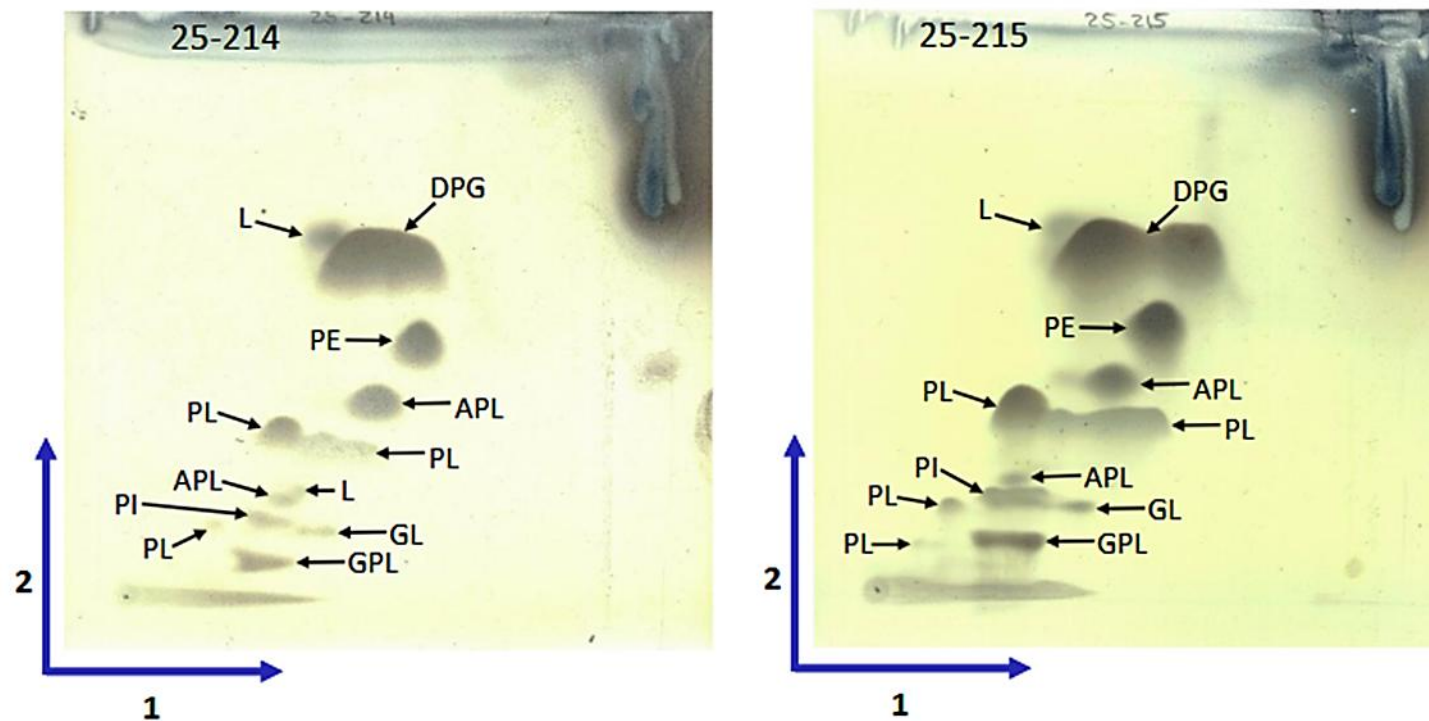

**Figure S6.** Two-dimensional thin-layer chromatogram showing the polar lipid profile of *Streptomyces* sp. ZE1316R2A<sup>T</sup> (25-215) and *Streptomyces albidoflavus* DSM 40455<sup>T</sup> (25-214). DPG: Diphosphatidylglycerol; PE: Phosphatidylethanolamine; PI: Phosphatidylinositol; APL: Aminophospholipid; GPL: Glycophospholipid; GL: Glycolipid; PL: Phospholipid; L: Lipid.
