# Supplementary material
Source: Research Square preprint supplement (doi:10.21203/rs.3.rs-9413337/v1)
Supplement: Supplementary file 3 [file e0a8f78e03afd6c995c953ad.pdf]

**Table S1.** List of *Streptomyces* type strains and their 16S rRNA gene accession numbers used for phylogenetic analysis.

| Scientific name                             | Type strain               | Accession numbers | Taxonomy                                                                                        | Database                |
|---------------------------------------------|---------------------------|-------------------|-------------------------------------------------------------------------------------------------|-------------------------|
| <i>Streptomyces</i> sp. ZE1316R2A           | -                         | PZ007821          | Bacteria ; Actinomycetota ; Actinomycetia ; Streptomycetales ; Streptomycetaceae ; Streptomyces | NCBI database           |
| <i>Streptomyces albidoflavus</i>            | DSM 40455 <sup>T</sup>    | Z76676            | Bacteria ; Actinomycetota ; Actinomycetia ; Streptomycetales ; Streptomycetaceae ; Streptomyces | EzBioCloud 16S database |
| <i>Streptomyces daghestanicus</i>           | NRRL B-5418 <sup>T</sup>  | DQ442497          | Bacteria ; Actinomycetota ; Actinomycetia ; Streptomycetales ; Streptomycetaceae ; Streptomyces | EzBioCloud 16S database |
| <i>Streptomyces violascens</i>              | ISP 5183 <sup>T</sup>     | AY999737          | Bacteria ; Actinomycetota ; Actinomycetia ; Streptomycetales ; Streptomycetaceae ; Streptomyces | EzBioCloud 16S database |
| <i>Streptomyces koyangensis</i>             | VK-A60 <sup>T</sup>       | CP031742          | Bacteria ; Actinomycetota ; Actinomycetia ; Streptomycetales ; Streptomycetaceae ; Streptomyces | EzBioCloud 16S database |
| <i>Streptomyces cadmiisoli</i>              | ZFG47 <sup>T</sup>        | CP030073          | Bacteria ; Actinomycetota ; Actinomycetia ; Streptomycetales ; Streptomycetaceae ; Streptomyces | EzBioCloud 16S database |
| <i>Streptomyces purpurascens</i>            | NBRC 13077 <sup>T</sup>   | AB184859          | Bacteria ; Actinomycetota ; Actinomycetia ; Streptomycetales ; Streptomycetaceae ; Streptomyces | EzBioCloud 16S database |
| <i>Streptomyces pyxinicus</i>               | LP11 <sup>T</sup>         | OL765279          | Bacteria ; Actinomycetota ; Actinomycetia ; Streptomycetales ; Streptomycetaceae ; Streptomyces | EzBioCloud 16S database |
| <i>Streptomyces hawaiiensis</i>             | NBRC 12784 <sup>T</sup>   | AB184143          | Bacteria ; Actinomycetota ; Actinomycetia ; Streptomycetales ; Streptomycetaceae ; Streptomyces | EzBioCloud 16S database |
| <i>Streptomyces luteogriseus</i>            | NBRC 13402 <sup>T</sup>   | AB184379          | Bacteria ; Actinomycetota ; Actinomycetia ; Streptomycetales ; Streptomycetaceae ; Streptomyces | EzBioCloud 16S database |
| <i>Streptomyces cupreus</i>                 | PSKA01 <sup>T</sup>       | JACMSF010000162   | Bacteria ; Actinomycetota ; Actinomycetia ; Streptomycetales ; Streptomycetaceae ; Streptomyces | EzBioCloud 16S database |
| <i>Streptomyces fumigatiscleroticus</i>     | NBRC 12999 <sup>T</sup>   | AB184248          | Bacteria ; Actinomycetota ; Actinomycetia ; Streptomycetales ; Streptomycetaceae ; Streptomyces | EzBioCloud 16S database |
| <i>Streptomyces levis</i>                   | NBRC 15423 <sup>T</sup>   | AB184670          | Bacteria ; Actinomycetota ; Actinomycetia ; Streptomycetales ; Streptomycetaceae ; Streptomyces | EzBioCloud 16S database |
| <i>Streptomyces violaceus</i>               | NRRL B-2867 <sup>T</sup>  | KL569104          | Bacteria ; Actinomycetota ; Actinomycetia ; Streptomycetales ; Streptomycetaceae ; Streptomyces | EzBioCloud 16S database |
| <i>Streptomyces venetus</i>                 | CMU-AB225 <sup>T</sup>    | LC073310          | Bacteria ; Actinomycetota ; Actinomycetia ; Streptomycetales ; Streptomycetaceae ; Streptomyces | EzBioCloud 16S database |
| <i>Streptomyces sennicompoti</i>            | RCPT1-4 <sup>T</sup>      | OM661191          | Bacteria ; Actinomycetota ; Actinomycetia ; Streptomycetales ; Streptomycetaceae ; Streptomyces | EzBioCloud 16S database |
| <i>Streptomyces spinoverrucosus</i>         | NBRC 14228 <sup>T</sup>   | AB184578          | Bacteria ; Actinomycetota ; Actinomycetia ; Streptomycetales ; Streptomycetaceae ; Streptomyces | EzBioCloud 16S database |
| <i>Streptomyces massasporeus</i>            | NBRC 12796 <sup>T</sup>   | AB184152          | Bacteria ; Actinomycetota ; Actinomycetia ; Streptomycetales ; Streptomycetaceae ; Streptomyces | EzBioCloud 16S database |
| <i>Streptomyces roseoviolaceus</i>          | ISP 5277 <sup>T</sup>     | AJ399484          | Bacteria ; Actinomycetota ; Actinomycetia ; Streptomycetales ; Streptomycetaceae ; Streptomyces | EzBioCloud 16S database |
| <i>Streptomyces jeddahensis</i>             | G25 <sup>T</sup>          | LOHS01000151      | Bacteria ; Actinomycetota ; Actinomycetia ; Streptomycetales ; Streptomycetaceae ; Streptomyces | EzBioCloud 16S database |
| <i>Streptomyces diastaticus</i>             | NBRC 3714 <sup>T</sup>    | AB184785          | Bacteria ; Actinomycetota ; Actinomycetia ; Streptomycetales ; Streptomycetaceae ; Streptomyces | EzBioCloud 16S database |
| <i>Streptomyces janthinus</i>               | ISP 5206 <sup>T</sup>     | AJ399478          | Bacteria ; Actinomycetota ; Actinomycetia ; Streptomycetales ; Streptomycetaceae ; Streptomyces | EzBioCloud 16S database |
| <i>Streptomyces carpinensis</i>             | NRRL B-16921 <sup>T</sup> | MUBM01000291      | Bacteria ; Actinomycetota ; Actinomycetia ; Streptomycetales ; Streptomycetaceae ; Streptomyces | EzBioCloud 16S database |
| <i>Streptomyces intermedius</i>             | NBRC 13049 <sup>T</sup>   | AB184277          | Bacteria ; Actinomycetota ; Actinomycetia ; Streptomycetales ; Streptomycetaceae ; Streptomyces | EzBioCloud 16S database |
| <i>Streptomyces spiralis</i>                | NBRC 14215 <sup>T</sup>   | AB184575          | Bacteria ; Actinomycetota ; Actinomycetia ; Streptomycetales ; Streptomycetaceae ; Streptomyces | EzBioCloud 16S database |
| <i>Streptomyces pluripotens</i>             | MUSC 135 <sup>T</sup>     | CP021080          | Bacteria ; Actinomycetota ; Actinomycetia ; Streptomycetales ; Streptomycetaceae ; Streptomyces | EzBioCloud 16S database |
| <i>Streptomyces cinerochromogenes</i>       | NBRC 13822 <sup>T</sup>   | AB184507          | Bacteria ; Actinomycetota ; Actinomycetia ; Streptomycetales ; Streptomycetaceae ; Streptomyces | EzBioCloud 16S database |
| <i>Streptomyces parvulus</i>                | NBRC 13193 <sup>T</sup>   | AB184326          | Bacteria ; Actinomycetota ; Actinomycetia ; Streptomycetales ; Streptomycetaceae ; Streptomyces | EzBioCloud 16S database |
| <i>Streptomyces coeruleofuscus</i>          | NBRC 12757 <sup>T</sup>   | AB184840          | Bacteria ; Actinomycetota ; Actinomycetia ; Streptomycetales ; Streptomycetaceae ; Streptomyces | EzBioCloud 16S database |
| <i>Streptomyces naganishii</i>              | NBRC 12892 <sup>T</sup>   | AB184224          | Bacteria ; Actinomycetota ; Actinomycetia ; Streptomycetales ; Streptomycetaceae ; Streptomyces | EzBioCloud 16S database |
| <i>Streptomyces muensis</i>                 | MBRL 179 <sup>T</sup>     | JN560155          | Bacteria ; Actinomycetota ; Actinomycetia ; Streptomycetales ; Streptomycetaceae ; Streptomyces | EzBioCloud 16S database |
| <i>Streptomyces tibetensis</i>              | XZ 46 <sup>T</sup>        | MH988793          | Bacteria ; Actinomycetota ; Actinomycetia ; Streptomycetales ; Streptomycetaceae ; Streptomyces | EzBioCloud 16S database |
| <i>Streptomyces coeruleorubidus</i>         | ISP 5145 <sup>T</sup>     | AJ306622          | Bacteria ; Actinomycetota ; Actinomycetia ; Streptomycetales ; Streptomycetaceae ; Streptomyces | EzBioCloud 16S database |
| <i>Streptomyces ferrugineus</i>             | HV38 <sup>T</sup>         | KF767859          | Bacteria ; Actinomycetota ; Actinomycetia ; Streptomycetales ; Streptomycetaceae ; Streptomyces | EzBioCloud 16S database |
| <i>Streptomyces misionensis</i>             | DSM 40306 <sup>T</sup>    | FNTD01000004      | Bacteria ; Actinomycetota ; Actinomycetia ; Streptomycetales ; Streptomycetaceae ; Streptomyces | EzBioCloud 16S database |
| <i>Streptomyces andamanensis</i>            | KC-112 <sup>T</sup>       | LC008305          | Bacteria ; Actinomycetota ; Actinomycetia ; Streptomycetales ; Streptomycetaceae ; Streptomyces | EzBioCloud 16S database |
| <i>Streptomyces cinereospinus</i>           | NBRC 15397 <sup>T</sup>   | AB184648          | Bacteria ; Actinomycetota ; Actinomycetia ; Streptomycetales ; Streptomycetaceae ; Streptomyces | EzBioCloud 16S database |
| <i>Streptomyces tuirus</i>                  | NBRC 15617 <sup>T</sup>   | AB184690          | Bacteria ; Actinomycetota ; Actinomycetia ; Streptomycetales ; Streptomycetaceae ; Streptomyces | EzBioCloud 16S database |
| <i>Streptomyces phaeoluteichromatogenes</i> | NRRL 5799 <sup>T</sup>    | AJ391814          | Bacteria ; Actinomycetota ; Actinomycetia ; Streptomycetales ; Streptomycetaceae ; Streptomyces | EzBioCloud 16S database |

**Table S1 (continued).** List of *Streptomyces* type strains and their 16S rRNA gene accession numbers used for phylogenetic analysis.

| Scientific name                   | Type strain               | Accession numbers | Taxonomy                                                                                        | Database                |
|-----------------------------------|---------------------------|-------------------|-------------------------------------------------------------------------------------------------|-------------------------|
| <i>Streptomyces coeruleus</i>     | ISP 5146 <sup>T</sup>     | AY999720          | Bacteria ; Actinomycetota ; Actinomycetia ; Streptomycetales ; Streptomycetaceae ; Streptomyces | EzBioCloud 16S database |
| <i>Streptomyces nogalater</i>     | JCM 4799 <sup>T</sup>     | AB045886          | Bacteria ; Actinomycetota ; Actinomycetia ; Streptomycetales ; Streptomycetaceae ; Streptomyces | EzBioCloud 16S database |
| <i>Streptomyces azureus</i>       | ATCC 14921 <sup>T</sup>   | DF968281          | Bacteria ; Actinomycetota ; Actinomycetia ; Streptomycetales ; Streptomycetaceae ; Streptomyces | EzBioCloud 16S database |
| <i>Streptomyces tacrolimicus</i>  | ATCC 55098 <sup>T</sup>   | FN429653          | Bacteria ; Actinomycetota ; Actinomycetia ; Streptomycetales ; Streptomycetaceae ; Streptomyces | EzBioCloud 16S database |
| <i>Streptomyces fabae</i>         | T66 <sup>T</sup>          | KM229360          | Bacteria ; Actinomycetota ; Actinomycetia ; Streptomycetales ; Streptomycetaceae ; Streptomyces | EzBioCloud 16S database |
| <i>Streptomyces malaysiense</i>   | MUSC 136 <sup>T</sup>     | LBDA02000093      | Bacteria ; Actinomycetota ; Actinomycetia ; Streptomycetales ; Streptomycetaceae ; Streptomyces | EzBioCloud 16S database |
| <i>Streptomyces nigra</i>         | 452 <sup>T</sup>          | MG572975          | Bacteria ; Actinomycetota ; Actinomycetia ; Streptomycetales ; Streptomycetaceae ; Streptomyces | EzBioCloud 16S database |
| <i>Streptomyces griseomycini</i>  | NBRC 12778 <sup>T</sup>   | AB184137          | Bacteria ; Actinomycetota ; Actinomycetia ; Streptomycetales ; Streptomycetaceae ; Streptomyces | EzBioCloud 16S database |
| <i>Streptomyces prasinosporus</i> | NRRL B-12431 <sup>T</sup> | DQ026655          | Bacteria ; Actinomycetota ; Actinomycetia ; Streptomycetales ; Streptomycetaceae ; Streptomyces | EzBioCloud 16S database |
| <i>Streptomyces afghaniensis</i>  | NBRC 12831 <sup>T</sup>   | AB184847          | Bacteria ; Actinomycetota ; Actinomycetia ; Streptomycetales ; Streptomycetaceae ; Streptomyces | EzBioCloud 16S database |
| <i>Streptomyces flavofungini</i>  | NBRC 13371 <sup>T</sup>   | AB184359          | Bacteria ; Actinomycetota ; Actinomycetia ; Streptomycetales ; Streptomycetaceae ; Streptomyces | EzBioCloud 16S database |
| <i>Streptomyces poonensis</i>     | NBRC 13485 <sup>T</sup>   | AB184437          | Bacteria ; Actinomycetota ; Actinomycetia ; Streptomycetales ; Streptomycetaceae ; Streptomyces | EzBioCloud 16S database |
| <i>Kitasatospora setae</i>        | NBRC 14216 <sup>T</sup>   | NR037063          | Bacteria; Actinomycetota; Actinomycetia; Streptomycetales; Streptomycetaceae; Kitasatospora     | EzBioCloud 16S database |

**Table S2.** List of whole-genome assemblies employed in this study, including scientific names, strain designations, genome assembly accession numbers, and taxonomic affiliations.

| Scientific name                      | Type strain             | Genome Assembly Accession | Taxonomy                                                                                    |
|--------------------------------------|-------------------------|---------------------------|---------------------------------------------------------------------------------------------|
| <i>Streptomyces</i> sp. ZE1316R2A    | -                       | GCA_055693065             | Bacteria; Actinomycetota; Actinomycetia; Streptomycetales; Streptomycetaceae; Streptomyces  |
| <i>Streptomyces pyixinicus</i>       | LP11 <sup>T</sup>       | GCA_024753135             | Bacteria; Actinomycetota; Actinomycetia; Streptomycetales; Streptomycetaceae; Streptomyces  |
| <i>Streptomyces naganishii</i>       | JCM 4654 <sup>T</sup>   | GCA_014650575             | Bacteria; Actinomycetota; Actinomycetia; Streptomycetales; Streptomycetaceae; Streptomyces  |
| <i>Streptomyces daghestanicus</i>    | JCM 4365 <sup>T</sup>   | GCA_014649475             | Bacteria; Actinomycetota; Actinomycetia; Streptomycetales; Streptomycetaceae; Streptomyces  |
| <i>Streptomyces vinaceudrappus</i>   | JCM 4529 <sup>T</sup>   | GCA_014650215             | Bacteria; Actinomycetota; Actinomycetia; Streptomycetales; Streptomycetaceae; Streptomyces  |
| <i>Streptomyces pilosus</i>          | JCM 4403 <sup>T</sup>   | GCA_014649835             | Bacteria; Actinomycetota; Actinomycetia; Streptomycetales; Streptomycetaceae; Streptomyces  |
| <i>Streptomyces resistomycificus</i> | DSM 40133 <sup>T</sup>  | GCA_001514265             | Bacteria; Actinomycetota; Actinomycetia; Streptomycetales; Streptomycetaceae; Streptomyces  |
| <i>Streptomyces massasporeus</i>     | JCM 4139 <sup>T</sup>   | GCA_014648995             | Bacteria; Actinomycetota; Actinomycetia; Streptomycetales; Streptomycetaceae; Streptomyces  |
| <i>Streptomyces violascens</i>       | JCM 4424 <sup>T</sup>   | GCA_014649955             | Bacteria; Actinomycetota; Actinomycetia; Streptomycetales; Streptomycetaceae; Streptomyces  |
| <i>Streptomyces rutgersensis</i>     | NBRC 12819 <sup>T</sup> | GCA_011170105             | Bacteria; Actinomycetota; Actinomycetia; Streptomycetales; Streptomycetaceae; Streptomyces  |
| <i>Streptomyces diastaticus</i>      | JCM 4128 <sup>T</sup>   | GCA_014648935             | Bacteria; Actinomycetota; Actinomycetia; Streptomycetales; Streptomycetaceae; Streptomyces  |
| <i>Streptomyces gougerotii</i>       | NBRC 13043 <sup>T</sup> | GCA_011170145             | Bacteria; Actinomycetota; Actinomycetia; Streptomycetales; Streptomycetaceae; Streptomyces  |
| <i>Streptomyces gougerotii</i>       | JCM 4136 <sup>T</sup>   | GCA_014648955             | Bacteria; Actinomycetota; Actinomycetia; Streptomycetales; Streptomycetaceae; Streptomyces  |
| <i>Streptomyces intermedicus</i>     | JCM 4483 <sup>T</sup>   | GCA_039532785             | Bacteria; Actinomycetota; Actinomycetia; Streptomycetales; Streptomycetaceae; Streptomyces  |
| <i>Streptomyces koyangensis</i>      | VK-A60 <sup>T</sup>     | GCA_003428925             | Bacteria; Actinomycetota; Actinomycetia; Streptomycetales; Streptomycetaceae; Streptomyces  |
| <i>Streptomyces albidoflavus</i>     | DSM 40455 <sup>T</sup>  | GCA_004195735             | Bacteria; Actinomycetota; Actinomycetia; Streptomycetales; Streptomycetaceae; Streptomyces  |
| <i>Streptomyces sampsonii</i>        | NBRC 13083 <sup>T</sup> | GCA_004195755             | Bacteria; Actinomycetota; Actinomycetia; Streptomycetales; Streptomycetaceae; Streptomyces  |
| <i>Streptomyces limosus</i>          | NBRC 12790 <sup>T</sup> | GCA_004195885             | Bacteria; Actinomycetota; Actinomycetia; Streptomycetales; Streptomycetaceae; Streptomyces  |
| <i>Kitasatospora setae</i>           | NBRC 14216 <sup>T</sup> | GCA_000269985             | Bacteria; Actinomycetota; Actinomycetia; Streptomycetales; Streptomycetaceae; Kitasatospora |

**Table S3.** Prediction of Biosynthetic Gene Clusters encoding for secondary metabolites in *Streptomyces* sp. ZE1316R2A<sup>T</sup>.

| antiSMASH<br>Region id | Begin          | End            | Length       | Region type                                                          | MIBiG             | Completion       | Product                                                                                                       |
|------------------------|----------------|----------------|--------------|----------------------------------------------------------------------|-------------------|------------------|---------------------------------------------------------------------------------------------------------------|
| 1                      | 81543          | 370759         | 289217       | T1PKS, NRPS, terpene                                                 | BGC0001012        | 1                | meridamycin                                                                                                   |
| 2                      | 552846         | 629448         | 76603        | terpene, NRPS-like, NRPS                                             | BGC0002318        | 0.285714         | canucin A/canucin B                                                                                           |
| 3                      | 758750         | 808157         | 49408        | T1PKS, NRPS                                                          | BGC0002365        | 1                | 10-epi-HSAF/10-epi-3-deOH-HSAF/10-epi-maltophilin/10-epi-xanthobaccin C/10-epi-hydroxymaltophilin/10-epi-FI-2 |
| 4                      | 841871         | 868418         | 26548        | terpene                                                              | BGC0000663        | 0.769231         | hopene                                                                                                        |
| 5                      | 948138         | 958353         | 10216        | RiPP-like                                                            | BGC0002497        | 0.0454545        | hexacosalactone A                                                                                             |
| 7                      | 1664138        | 1697212        | 33075        | NI-siderophore                                                       | BGC0002633        | 0.25             | schizokinen                                                                                                   |
| 8                      | 1936268        | 1958568        | 22301        | terpene                                                              | BGC0001181        | 1                | geosmin                                                                                                       |
| 9                      | 2314597        | 2335571        | 20975        | terpene                                                              | BGC0000660        | 1                | albaflavenone                                                                                                 |
| 10                     | 2834304        | 2869002        | 34699        | LAP, thiopeptide, RRE-containing                                     | BGC0001596        | 0.0465116        | fluostatins M-Q                                                                                               |
| 11                     | 3191354        | 3213933        | 22580        | lanthipeptide-class-iii                                              | BGC0000551        | 1                | SapB                                                                                                          |
| <b>12</b>              | <b>3443744</b> | <b>3466031</b> | <b>22288</b> | <b>Lasso peptide</b>                                                 | <b>BGC0000704</b> | <b>0.075</b>     | <b>kanamycin</b>                                                                                              |
| 13                     | 3526519        | 3588751        | 62233        | NRPS                                                                 | BGC0002358        | 0.208333         | cyclofaulknamycin                                                                                             |
| <b>14</b>              | <b>4199097</b> | <b>4209543</b> | <b>10447</b> | <b>RiPP-like</b>                                                     | <b>BGC0000973</b> | <b>0.0740741</b> | <b>collismycin A</b>                                                                                          |
| 15                     | 4262748        | 4371391        | 108644       | NRPS, LAP                                                            | BGC0001792        | 0.952381         | surugamide A/surugamide D                                                                                     |
| 16                     | 5063590        | 5093410        | 29821        | NI-siderophore                                                       | BGC0001478        | 1                | desferrioxamine E                                                                                             |
| 17                     | 5992397        | 6002795        | 10399        | ectoine                                                              | BGC0002052        | 1                | ectoine                                                                                                       |
| 18                     | 6793433        | 6820745        | 27313        | RiPP-like, terpene                                                   | BGC0000664        | 0.857143         | isorenieratene                                                                                                |
| 19                     | 6905561        | 6916928        | 11368        | RiPP-like                                                            | BGC0002115        | 0.75             | streptamidine                                                                                                 |
| 20                     | 6918110        | 7244104        | 325995       | T3PKS, T1PKS, NRPS-like,<br>NRPS, lanthipeptide-class-ii,<br>terpene | BGC0000958        | 1                | antimycin                                                                                                     |

**In bold:** Product specific to ZE1316R2A<sup>T</sup>

**Table S4.** Prediction of Biosynthetic Gene Clusters encoding potentially novel secondary metabolites in *Streptomyces* sp. ZE1316R2A<sup>T</sup>.

| <b>antiSMASH Region id</b> | <b>Begin</b> | <b>End</b> | <b>Length</b> | <b>Region type</b> |
|----------------------------|--------------|------------|---------------|--------------------|
| <b>6</b>                   | 1366916      | 1378244    | 11329         | RiPP-like          |

**Table S5.** Prediction of Biosynthetic Gene Clusters encoding for secondary metabolites in strain *Streptomyces albidoflavus* DSM 40455<sup>T</sup>.

| antiSMASH Region id | Begin          | End            | Length       | Region type                                    | MIBiG             | Completion      | Product                                                                                                       |
|---------------------|----------------|----------------|--------------|------------------------------------------------|-------------------|-----------------|---------------------------------------------------------------------------------------------------------------|
| 2                   | 257826         | 294621         | 36796        | NRPS                                           | BGC0002358        | 0.75            | cyclofaulknamycin                                                                                             |
| 3                   | 339072         | 416572         | 77501        | terpene, NRPS-like, NRPS                       | BGC0002318        | 0.285714        | canucin A/canucin B                                                                                           |
| 4                   | 581777         | 604268         | 22492        | NRPS                                           | BGC0002358        | 0.291667        | cyclofaulknamycin                                                                                             |
| 5                   | 710418         | 743449         | 33032        | NI-siderophore                                 | BGC0002633        | 0.25            | schizokinen                                                                                                   |
| 6                   | 1242419        | 1272160        | 29742        | NRPS                                           | BGC0001792        | 0.47619         | surugamide A/surugamide D                                                                                     |
| 7                   | 1272261        | 1308569        | 36309        | NRPS                                           | BGC0001792        | 0.190476        | surugamide A/surugamide D                                                                                     |
| 8                   | 1308670        | 1343516        | 34847        | NRPS, LAP                                      | BGC0001792        | 0.47619         | surugamide A/surugamide D                                                                                     |
| 9                   | 2136459        | 2171144        | 34686        | LAP, thiopeptide, RRE-containing               | BGC0001596        | 0.0465116       | fluostatins M-Q                                                                                               |
| 10                  | 2448111        | 2469946        | 21836        | lanthipeptide-class-iii                        | BGC0000551        | 1               | SapB                                                                                                          |
| <b>11</b>           | <b>2495532</b> | <b>2555992</b> | <b>60461</b> | <b>NRPS</b>                                    | <b>BGC0000388</b> | <b>0.518519</b> | <b>mannopeptimycin</b>                                                                                        |
| 13                  | 3847587        | 3857985        | 10399        | Ectoine                                        | BGC0002052        | 1               | Ectoine                                                                                                       |
| <b>15</b>           | <b>4109193</b> | <b>4153023</b> | <b>43831</b> | <b>NRPS-like</b>                               | <b>BGC0002295</b> | <b>0.8</b>      | <b>minimycin</b>                                                                                              |
| 16                  | 4173152        | 4200465        | 27314        | RiPP-like, terpene                             | BGC0000664        | 0.857143        | isorenieratene                                                                                                |
| 17                  | 4288434        | 4299801        | 11368        | RiPP-like                                      | BGC0002115        | 0.75            | streptamidine                                                                                                 |
| <b>18</b>           | <b>4316691</b> | <b>4357788</b> | <b>41098</b> | <b>T3PKS</b>                                   | <b>BGC0001310</b> | <b>1</b>        | <b>naringenin</b>                                                                                             |
| 19                  | 4362758        | 4468416        | 105659       | T1PKS                                          | BGC0001012        | 1               | meridamycin                                                                                                   |
| 20                  | 4468517        | 4597992        | 129476       | T1PKS, NRPS-like, NRPS, lanthipeptide-class-ii | BGC0000958        | 1               | antimycin                                                                                                     |
| <b>21</b>           | <b>4855298</b> | <b>4905587</b> | <b>50290</b> | <b>NRPS</b>                                    | <b>BGC0000325</b> | <b>0.363636</b> | <b>coelichelin</b>                                                                                            |
| 22                  | 5132758        | 5155043        | 22286        | terpene                                        | BGC0001181        | 1               | geosmin                                                                                                       |
| 23                  | 5492554        | 5513528        | 20975        | terpene                                        | BGC0000660        | 1               | Albaflavenone                                                                                                 |
| <b>24</b>           | <b>5873092</b> | <b>5917441</b> | <b>44350</b> | <b>NRPS</b>                                    | <b>BGC0002359</b> | <b>0.173913</b> | <b>dudomycin A</b>                                                                                            |
| 25                  | 6462778        | 6492598        | 29821        | NI-siderophore                                 | BGC0001478        | 1               | desferrioxamine E                                                                                             |
| 27                  | 6728226        | 6777636        | 49411        | NRPS, T1PKS                                    | BGC0002365        | 1               | 10-epi-HSAF/10-epi-3-deOH-HSAF/10-epi-maltophilin/10-epi-xanthobaccin C/10-epi-hydroxymaltophilin/10-epi-FI-2 |
| 28                  | 6812146        | 6838710        | 26565        | terpene                                        | BGC0000663        | 0.769231        | hopene                                                                                                        |
| 29                  | 6904243        | 6914458        | 10216        | RiPP-like                                      | BGC0002497        | 0.0454545       | hexacosalactone A                                                                                             |

**In bold:** Product specific to DSM 40455<sup>T</sup>

**Table S6.** Prediction of Biosynthetic Gene Clusters encoding potentially novel secondary metabolites in *Streptomyces albidoflavus* DSM 40455<sup>T</sup>.

| <b>antiSMASH Region id</b> | <b>Begin</b> | <b>End</b> | <b>Length</b> | <b>Region type</b> |
|----------------------------|--------------|------------|---------------|--------------------|
| <b>1</b>                   | 6005         | 17333      | 11329         | RiPP-like          |
| <b>12</b>                  | 3102688      | 3109320    | 6633          | transAT-PKS        |
| <b>14</b>                  | 3933927      | 3936412    | 2486          | NRPS               |
| <b>26</b>                  | 6665084      | 6690102    | 25019         | T1PKS              |

**Table S7.** Functional comparison of lipid metabolic pathways in *Streptomyces* sp. ZE1316R2A<sup>T</sup> and *S. albidoflavus* 40455<sup>T</sup> based on KEGG and MicroCyc annotations, including conserved lipid metabolic cores and accessory lipid-related reactions.

| Pathway / Reaction                             | ZE1316R2A <sup>T</sup> | DSM 40455 <sup>T</sup> | Database | Notes                                                                       |
|------------------------------------------------|------------------------|------------------------|----------|-----------------------------------------------------------------------------|
| <b>Fatty acid biosynthesis</b>                 | ✓                      | ✓                      | KEGG     | Conserved core                                                              |
| <b>Fatty acid elongation</b>                   | ✓                      | ✓                      | KEGG     | Conserved core                                                              |
| <b>Fatty acid degradation (β-oxidation)</b>    | ✓                      | ✓                      | KEGG     | Conserved core                                                              |
| <b>Glycerolipid metabolism</b>                 | ✓                      | ✓                      | KEGG     | Conserved core                                                              |
| <b>Glycerophospholipid metabolism</b>          | ✓                      | ✓                      | KEGG     | Conserved core                                                              |
| <b>Farnesyl-PP → presqualene-PP → squalene</b> | Present                | Absent                 | KEGG     | Part of triterpenoid precursor branch (annot. under "steroid biosynthesis") |
| <b>Acetone → acetoacetate</b>                  | Partial                | Absent                 | MicroCyc | Acetone degradation II (fragment)                                           |
| <b>Acetoacetate → acetyl-CoA</b>               | Present (partial)      | Reduced                | MicroCyc | Fragment of acetoacetate degradation                                        |
| <b>Cutin/suberin/wax biosynthesis (KEGG)</b>   | Present (1 gene)       | Absent                 | KEGG     | Likely spurious; bacterial relevance limited                                |
| <b>Ether lipid metabolism</b>                  | Present (1 gene)       | Present (2 genes)      | KEGG     | Minimal difference                                                          |

**KEGG:** Kyoto Encyclopedia of Genes and Genomes

**MicroCyc:** Collection of microbial Pathway/Genome Databases

**Table S8.** Comparative Analysis of CAZyme Families and Their Functional Profiles in *Streptomyces* sp. ZE1316R2A<sup>T</sup> and *Streptomyces albidoflavus* DSM 40455<sup>T</sup>.

| Famille CAZyme                               | Principal function                               | <i>Streptomyces</i> sp. ZE1316R2A <sup>T</sup>                                                                                                                                                                                                                                                                                                                                                                                                                                                                                                                                              | <i>S. albidoflavus</i> DSM 40455 <sup>T</sup>                                                                                                                                                                                                                                                                                                                                                                                                                                                                                                                                                     |
|----------------------------------------------|--------------------------------------------------|---------------------------------------------------------------------------------------------------------------------------------------------------------------------------------------------------------------------------------------------------------------------------------------------------------------------------------------------------------------------------------------------------------------------------------------------------------------------------------------------------------------------------------------------------------------------------------------------|---------------------------------------------------------------------------------------------------------------------------------------------------------------------------------------------------------------------------------------------------------------------------------------------------------------------------------------------------------------------------------------------------------------------------------------------------------------------------------------------------------------------------------------------------------------------------------------------------|
| <b>AA</b><br>(Auxiliary Activities)          | Oxidation, lignocellulose degradation            | AA1(1), AA2(1), <b>AA3(3)</b> , <b>AA4(2)</b> , AA5(2), AA6(1), AA9(1), AA10(4)                                                                                                                                                                                                                                                                                                                                                                                                                                                                                                             | AA1(1), AA2(1), <b>AA3(4)</b> , <b>AA4(1)</b> , AA5(2), AA6(1), AA9(1), AA10(4)                                                                                                                                                                                                                                                                                                                                                                                                                                                                                                                   |
| <b>CBM</b><br>(Carbohydrate Binding Modules) | Binding to polysaccharides                       | <b>CBM2(2)</b> , CMB3(2), CBM4(2), <b>CMB5(2)</b> , CBM6(3), <b>CBM12(4)</b> , <b>CBM13(12)</b> , CBM16(1), CMB20(1), <b>CBM32(7)</b> , CMB35(2), <b>CMB38(2)</b> , CMB42(1), CMB48(7), <b>CMB50(7)</b> , CMB51(1)                                                                                                                                                                                                                                                                                                                                                                          | <b>CBM2(3)</b> , CMB3(2), CBM4(2), <b>CMB5(4)</b> , CBM6(3), <b>CMB12(5)</b> , <b>CBM13(9)</b> , CBM16(1), CMB20(1), <b>CMB32(6)</b> , CMB35(2), <b>CMB38(1)</b> , CMB42(1), CMB48(7), <b>CMB50(13)</b> , CMB51(1), CMB92(1) *, CMB96(1) *                                                                                                                                                                                                                                                                                                                                                        |
| <b>CE</b><br>(Carbohydrate Esterases)        | Deacylation, modification of polysaccharides     | <b>CE1(4)</b> , CE3(1), <b>CE4(11)</b> , CE7(2), <b>CE8(1)</b> , <b>CE9(3)</b> , CE12(2), <b>CE14(3)</b>                                                                                                                                                                                                                                                                                                                                                                                                                                                                                    | <b>CE1(5)</b> , CE3(1), <b>CE4(10)</b> , CE7(2), <b>CE8(2)</b> , <b>CE9(4)</b> , CE12(2), <b>CE14(4)</b>                                                                                                                                                                                                                                                                                                                                                                                                                                                                                          |
| <b>GH</b><br>(Glycoside Hydrolases)          | Hydrolysis of glycosidic bonds                   | GH0(3), <b>GH1(7)</b> , <b>GH2(2)</b> , <b>GH3(6)</b> , <b>GH4(3)</b> , <b>GH5(3)</b> , GH6(2), GH9(1), <b>GH13(14)</b> , GH15(2), <b>GH16(1)</b> , <b>GH18(4)</b> , GH19(2), GH20(3), <b>GH23(15)</b> , GH25(3), <b>GH28(2)</b> , GH29(1) *, GH31(2), GH32(2), GH33(1), <b>GH38(2)</b> , GH39(2), GH43(1)*, GH46(2), GH47(2), GH63(1), GH64(1), GH65(2)*, <b>GH71(2)</b> , GH75(2)*, GH76(3), GH77(1), GH81(1), GH84(2), GH87(1), <b>GH101(3)</b> , GH109(1)*, <b>GH114(1)</b> , GH131(1), GH132(1), GH135(1), GH171(1), GH176(1), GH178(1), GH179(2), GH183(2), GH184(2), <b>GH188(3)</b> | GH0(3), <b>GH1(5)</b> , <b>GH2(3)</b> , <b>GH3(7)</b> , <b>GH4(4)</b> , <b>GH5(1)</b> , GH6(2), GH9(1), <b>GH13(15)</b> , GH15(2), <b>GH16(2)</b> , <b>GH18(5)</b> , GH19(2), GH20(3), <b>GH23(10)</b> , GH25(3), GH27(1) *, <b>GH28(3)</b> , GH31(2), GH32(2), GH33(1), GH35(1) *, <b>GH38(4)</b> , GH39(2), GH46(2), GH47(2), GH63(1), GH64(1), <b>GH71(3)</b> , GH76(3), GH77(1), GH81(1), GH84(2), GH87(1), <b>GH101(2)</b> , <b>GH114(2)</b> , GH127(1) *, GH131(1), GH132(1), GH135(1), GH144(1) *, GH152(1) *, GH171(1), GH176(1), GH178(1), GH179(2), GH183(2), GH184(2), <b>GH188(2)</b> |
| <b>GT</b><br>(Glycosyltransferases)          | Biosynthesis and modification of polysaccharides | <b>GT1(14)</b> , <b>GT2(52)</b> , <b>GT4(16)</b> , GT9(2) *, GT20(1), <b>GT28(4)</b> , GT35(1), GT39(1), <b>GT47(1)</b> , <b>GT49(1)</b> , <b>GT51(4)</b> , GT76(2), <b>GT81(1)</b> , GT83(1), GT87(4), GT119(5)                                                                                                                                                                                                                                                                                                                                                                            | <b>GT1(21)</b> , <b>GT2(36)</b> , <b>GT4(18)</b> , GT20(1), GT22(1) *, <b>GT28(3)</b> , GT30(1) *, GT34(1) *, GT35(1), GT39(1), GT41(1) *, GT44(1) *, <b>GT47(2)</b> , <b>GT49(3)</b> , GT50(1) *, <b>GT51(5)</b> , GT76(2), <b>GT81(2)</b> , GT83(1), GT87(4), GT119(5)                                                                                                                                                                                                                                                                                                                          |
| <b>PL</b><br>(Polysaccharide Lyases)         | Non-hydrolytic cleavage of polysaccharides       | PL31 (1)                                                                                                                                                                                                                                                                                                                                                                                                                                                                                                                                                                                    | PL4(1) *, PL31 (1)                                                                                                                                                                                                                                                                                                                                                                                                                                                                                                                                                                                |

**In bold:** Indicates differences in CAZyme numbers between strain ZE1316R2A and strain DSM 40455<sup>T</sup>

\*: Indicates the presence of the CAZyme in only one strain

**Table S9.** Growth responses of *Streptomyces* sp. ZE1316R2A<sup>T</sup> and *Streptomyces albidoflavus* DSM 40455<sup>T</sup> under different salinity, temperature and pH conditions after 14 days of incubation

|                         | Condition | <i>Streptomyces</i> sp. ZE1316R2A <sup>T</sup> | <i>S. albidoflavus</i><br>DSM 40455 <sup>T</sup> |
|-------------------------|-----------|------------------------------------------------|--------------------------------------------------|
| <b>Salinity (%)</b>     | 0         | ++++                                           | ++++                                             |
|                         | 5         | +                                              | +                                                |
|                         | 10        | -                                              | -                                                |
|                         | 15        | -                                              | -                                                |
|                         | 20        | -                                              | -                                                |
| <b>Temperature (°C)</b> | 5         | -                                              | -                                                |
|                         | 16        | +++                                            | +++                                              |
|                         | 28        | ++++                                           | ++++                                             |
|                         | 30        | ++++                                           | ++++                                             |
|                         | 37        | ++                                             | ++++                                             |
|                         | 50        | -                                              | -                                                |
| <b>pH</b>               | 5.5       | -                                              | -                                                |
|                         | 6.5       | ++++                                           | ++++                                             |
|                         | 7         | ++++                                           | ++++                                             |
|                         | 7.5       | ++++                                           | ++++                                             |
|                         | 8.5       | ++++                                           | ++++                                             |

**Growth code legend:** (-): No growth; (+) Poor growth; (++) Moderate growth; (+++): Good growth; (++++): Abundant growth

**Table S10.** Differential carbohydrate utilisation patterns of *Streptomyces* sp. ZE1316R2A<sup>T</sup> and closely related strain *Streptomyces albidoflavus* DSM 40455<sup>T</sup>.

| <b>Carbohydrate</b> | <b><i>Streptomyces</i> sp. ZE1316R2A<sup>T</sup></b> | <b><i>S. albidoflavus</i> DSM 40455<sup>T</sup></b> |
|---------------------|------------------------------------------------------|-----------------------------------------------------|
| D-Arabinose         | -                                                    | +                                                   |
| L-Arabinose         | -                                                    | +                                                   |
| D-Ribose            | -                                                    | +                                                   |
| D-Glucose           | -                                                    | +                                                   |
| D-Fructose          | -                                                    | +                                                   |
| D-Mannose           | +                                                    | -                                                   |
| D-Mannitol          | -                                                    | +                                                   |
| Amygdalin           | -                                                    | +                                                   |
| D-Cellobiose        | -                                                    | +                                                   |
| D-Lactose           | -                                                    | +                                                   |
| D-Melezitose        | -                                                    | +                                                   |
| D-Fucose            | -                                                    | +                                                   |

(+), positive reaction ; (-), negative reaction.
